1 ATP hydrolysis coordinates the activities of two motors in a dimeric  
2 chromatin remodeling enzyme

3 Stephanie L. Johnson,  
Department of Biochemistry and Biophysics,  
University of California, San Francisco,  
San Francisco, CA, USA  
Present address: Eikon Therapeutics,  
Hayward, CA, USA

4 Geeta Narlikar,  
Department of Biochemistry and Biophysics,  
University of California, San Francisco,  
San Francisco, CA, USA  
Correspondence: [geeta.narlikar@ucsf.edu](mailto:geeta.narlikar@ucsf.edu)

5 **Abstract**

6 ATP-dependent chromatin remodelers are essential enzymes that restructure eukaryotic genomes  
7 to enable all DNA-based processes. The diversity and complexity of these processes are matched  
8 by the complexity of the enzymes that carry them out, making remodelers a challenging class of  
9 molecular motors to study by conventional methods. Here we use a single molecule biophysical assay  
10 to overcome some of these challenges, enabling a detailed mechanistic dissection of a paradigmatic  
11 remodeler reaction, that of sliding a nucleosome towards the longer DNA linker. We focus on how  
12 two motors of a dimeric remodeler coordinate to accomplish such directional sliding. We find that  
13 ATP hydrolysis by both motors promotes coordination, suggesting a role for ATP in resolving the  
14 competition for directional commitment. Furthermore, we show an artificially constitutive dimer is  
15 no more or less coordinated, but is more processive, suggesting a cell could modulate a remodeler's  
16 oligomeric state to modulate local chromatin dynamics.

## 17 1 Introduction

18 ATP-dependent chromatin remodelers are enzymes that restructure eukaryotic genomes in order to  
19 facilitate all DNA-based processes, including transcription, DNA damage repair, and replication ([1,  
20 2, 3]). Their substrates are chromatin, the protein-nucleic acid complex that stores a cell's genetic  
21 information, and in particular the nucleosome, the basic repeating unit of chromatin, consisting of  
22 147 bp of DNA wrapped nearly twice around a core of histone proteins. Chromatin remodelers catalyze  
23 a variety of transformations of nucleosomes, including nucleosome sliding, nucleosome assembly and  
24 disassembly, and the exchange of core histone proteins with histone variants ([4]).

25 Perhaps not surprisingly, given the involvement of remodelers in so many key genomic processes,  
26 mutations or disruptions to remodelers have been implicated in cancer, developmental disorders, and  
27 other diseases ([1, 5, 6, 7]). Yet they remain elusive therapeutic targets because they are challenging  
28 to study by the conventional biochemical approaches that have rendered other molecular complexes  
29 amenable to pharmaceutical analysis. In addition to the inherent complexity of their chromatin sub-  
30 strates, remodelers themselves can be large, multi-subunit complexes, up to more than a megadalton  
31 in size, and their component subunits can have multiple "moving parts" that undergo large conforma-  
32 tional changes during the reaction cycle ([4, 8, 9]). Moreover, the reactions these remodelers catalyze  
33 often involve large-scale physical, not just chemical, alterations to the substrate ([4]).

34 In light of these challenges, single molecule biophysical approaches have generated significant en-  
35 thusiasm in the field for their potential to open new windows into remodelers ([10, 11, 12, 13, 14, 15,  
36 16, 17, 18]). These approaches overcome some of the difficulties listed above by bypassing the need to  
37 study remodelers in asynchronous ensemble populations. In addition, many single molecule biophysical  
38 techniques are more readily suited to detecting large physical or structural changes to a substrate.

39 Here we use single molecule fluorescence resonance energy transfer (smFRET) to gain detailed  
40 mechanistic insights into a common but still opaque reaction catalyzed by many chromatin remodel-  
41 ers: directional nucleosome sliding. A majority of chromatin remodelers studied to date are capable  
42 of sliding nucleosomes along the DNA, and, interestingly, most of them do so in a highly regulated  
43 manner, preferentially sliding a nucleosome towards the longer flanking DNA ([4, 19]). This directional  
44 nucleosome sliding is thought to contribute to the generation of evenly spaced nucleosomal arrays, as  
45 nucleosomes are continuously moved in the direction of the longer linker DNA until the lengths of DNA  
46 between nucleosomes has been equalized ([20, 21]). Evenly spaced arrays of nucleosomes are associated  
47 with transcriptionally silenced, heterochromatic regions of the genome, as well as with other chromatin  
48 structural features like TAD boundaries ([22, 23, 24, 25, 26]). Nucleosome sliding in the direction of  
49 longer flanking DNA may also allow remodelers to facilitate transcriptional activation and/or repres-  
50 sion, by moving nucleosomes away from genomic features such as DNA-bound transcription factors  
51 ([27, 28]).

52 The ISWI family of chromatin remodelers has become a paradigm for this directional nucleosome  
53 sliding activity, particularly the ACF remodeler, a complex of SNF2h, the ATP-hydrolyzing motor  
54 subunit, and Acf1, a non-catalytic accessory subunit. A common in vitro proxy assay for the activity  
55 of evenly spacing nucleosome arrays is the centering of a mononucleosome, a single nucleosome on a  
56 short DNA: equalizing the linker DNAs in an array translates to equalizing the lengths of the DNAs  
57 flanking the mononucleosome. In ensemble in vitro experiments using this mononucleosome proxy,  
58 both ACF and the SNF2h motor subunit alone slide mononucleosomes faster when they have longer  
59 flanking DNA ([29, 21]). This kinetic discrimination explains their preference for sliding nucleosomes  
60 in the direction of the longer flanking DNA, and, presumably, their ability to space arrays ([21]).

61 In addition to its biological importance, the ability to slide nucleosomes preferentially towards

62 longer flanking DNA presents a fascinating biophysical challenge. Not only must the length of the  
63 DNA external to each nucleosome be assessed by these enzymes, but a *comparative* measurement  
64 of the *relative* lengths of DNA on either side of the nucleosome must be accomplished. How is this  
65 comparative assessment made? Part of the answer seems to lie in the ability of ACF and SNF2h, though  
66 monomeric in solution, to dimerize on the nucleosome, and in fact to slide nucleosomes most efficiently  
67 as dimers ([30, 11, 31]). However, this raises the further question of how two motors coordinate their  
68 activities across their substrate without engaging in a “tug-of-war”.

69 To better understand how this coordination is achieved, we capitalized on our recent work with  
70 synthetic, constitutively dimeric forms of the SNF2h motor subunit ([31]). These synthetic enzymes,  
71 which we call [wt]-[wt], are covalently linked such that they are dimeric in solution, which allows us  
72 to also make asymmetric mutations in the [wt]-[wt] complex, to investigate various aspects of the two  
73 protomers’ coordination.

74 These synthetic dimers, in conjunction with the ability to watch them individually remodel single  
75 nucleosomes by smFRET, enabled us to dissect how two SNF2h motors coordinate their activities in  
76 unparalleled detail. We show that covalently linking two SNF2h motors not only maintains their ability  
77 to coordinate their activities, but also makes the synthetic dimer processive, whereas SNF2h alone is  
78 not processive. Further, we show that ATP hydrolysis by both motors in a SNF2h dimer enables them  
79 to coordinate their DNA length sensing activities and avoid a tug of war. The use of ATP hydrolysis to  
80 regulate remodeling, not just as a source of energy coupled to the physical work of nucleosome sliding,  
81 is emerging as a common theme in DNA-length-sensitive nucleosome sliding enzymes ([15, 11, 12, 31].  
82 We describe here new mechanistic details for how ATP can be used to regulate nucleosome sliding in  
83 a paradigmatic remodeler family.

## 84 2 Results

### 85 2.1 A constitutively dimeric SNF2h remodels single nucleosomes like wild-type 86 SNF2h.

87 Our previous work with the constitutively dimeric [wt]-[wt] construct uncovered no major remodeling  
88 defects compared to wild-type SNF2h in ensemble assays ([31]). However, single-molecule FRET  
89 provides a more detailed view of the nucleosome sliding reaction and can report on dynamics that  
90 might be obscured by the population averaging of ensemble assays. Therefore, we first compared the  
91 remodeling reaction of [wt]-[wt] to SNF2h at the single nucleosome level. We find that the [wt]-[wt]  
92 construct behaves similarly to SNF2h, with a key exception that will be discussed in the next section.

93 ISWI-family remodelers, including SNF2h, have been shown to slide single nucleosomes in an alter-  
94 nating pattern of pause and nucleosome translocation events ([11, 12, 13, 9]). When observed by single  
95 molecule FRET (Fig. 1(A)), the pauses appear as relatively long periods where the FRET remains  
96 constant and the nucleosome is not being slid ( $p_{\text{wait}}$ ,  $p_1$ , and  $p_2$  in Fig. 1(B)), whereas nucleosome  
97 translocation appears as short, rapid drops in FRET intensity (called  $t_1$  and  $t_2$ ). Importantly, the  
98 pauses have been shown to be regulatory events. It is during the pause phases of the reaction that  
99 regulatory information such as flanking DNA length is sensed ([13, 9]) and, presumably, used to gate  
100 the sliding reaction that takes place in the translocation phases. In particular, the “decision” about  
101 which direction to move the nucleosome, based on regulatory information such as the relative lengths  
102 of the DNAs flanking the nucleosome, must happen in the pause, before the nucleosome is moved in  
103 the translocation phase.

104 This also means that any *coordination* between the two SNF2h motors to “decide” which direction

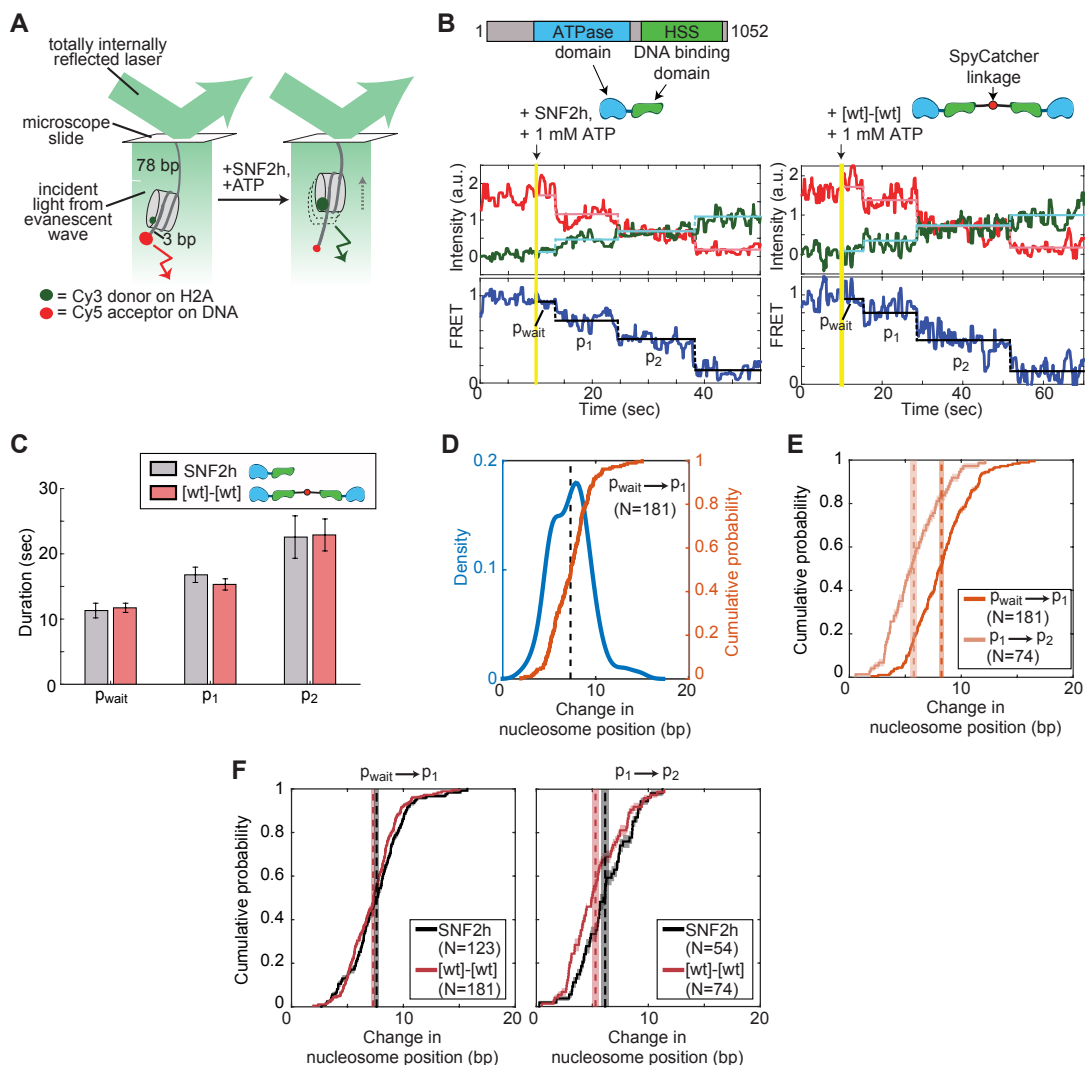

**Figure 1: A constitutively dimeric SNF2h retains key features of the remodeling reaction at the single nucleosome level.** (A) Schematic of the smFRET setup. Nucleosomes (here, initially end-positioned “3/78”) start in high FRET. As SNF2h slides the nucleosome towards the center of the DNA, the distance between the Cy3 and Cy5 dye pair increases, leading to decreased FRET. (B) (top) Domain architecture of SNF2h, showing the two major domains that will be drawn schematically in blue (ATPase domain) and green (DNA binding domain) in the rest of this work. (bottom) Example traces of SNF2h (left) and [wt]-[wt] (right) remodeling single nucleosomes, with the first three pauses labeled ( $p_{wait}$ ,  $p_1$ ,  $p_2$ ). Vertical yellow lines indicate time at which enzyme and ATP are injected into the sample chamber. (C) Average durations of the first three pauses exhibited by SNF2h or [wt]-[wt], for ~100 nucleosomes each. Errors are bootstrapped as described in the Methods. (D) Kernel density estimation (KDE, blue) and empirical cumulative distribution function (CDF, orange) of the change in nucleosome position between  $p_{wait}$  and  $p_1$  for 181 nucleosomes remodeled by [wt]-[wt]. KDEs can be more intuitive visually, but CDFs are a more quantitative way to compare data sets. Peaks in the KDE correspond to steep slopes in the CDF. Vertical black dashed line is the mean. N: number of events included in the KDE and CDF. (E) CDFs of the change in nucleosome position between  $p_{wait}$  and  $p_1$  (first translocation phase) versus  $p_1$  and  $p_2$  (second translocation phase) for [wt]-[wt], showing the initial larger step followed by a smaller second step. Mean step sizes are indicated by dashed vertical lines (with shaded region representing the error) and are  $7.3 \pm 0.2$  and  $5.3 \pm 0.3$  bp, for the first and second translocation phases respectively. (F) CDFs of the change in nucleosome position during the first (left) or second (right) translocation phases for SNF2h versus [wt]-[wt]. Mean step sizes for SNF2h are  $7.6 \pm 0.2$  and  $6.2 \pm 0.3$  bp for the first and second translocation phases respectively. See Fig. S5 for corresponding step size KDEs. In all panels, enzyme concentrations are saturating (51 nM SNF2h, 25 nM [wt]-[wt]); ATP concentration is also saturating (1 mM). Errors on the CDFs and mean step sizes are determined by a bootstrapping approach (see Methods).

105 to slide the nucleosome must take place during the pauses. As shown in Fig. 1(C), wild-type SNF2h  
106 and the constitutive [wt]-[wt] dimer have identical pause durations when they remodel initially end-  
107 positioned “3/78” nucleosomes (nucleosomes with 3 bp of flanking DNA on one side and 78 bp on the  
108 other). This indicates that by forcing SNF2h to be a dimer, we have not compromised the ability of  
109 the two protomers to coordinate their activities; a compromise in coordination should result in a “tug-  
110 of-war” that would make it harder for the enzyme to exit the pause phase, and thus should increase  
111 the durations of the pauses. We do not observe any such increase in pause duration with [wt]-[wt].  
112 (The pause durations are not shorter with [wt]-[wt], either, indicating that we have not created a more  
113 efficient remodeler.)

114 In addition to a stereotyped, alternating pattern of pauses and translocations, all ISWI-family  
115 remodelers studied by smFRET to date also exhibit a stereotyped pattern of step sizes, defined as the  
116 distance the nucleosome is slid during the translocation phases. The first translocation event slides the  
117 nucleosome  $\sim$ 7-8 bp on average, whereas subsequent translocation events each move the nucleosome  
118  $\sim$ 5 bp (Fig. 1(D,E), Fig. S5, [11, 12, 13, 9]). This pattern of an initial large step followed by smaller  
119 steps is maintained in the constitutive dimer (Fig. 1(F)).

120 Thus by forcing SNF2h to be a constitutive dimer, we have not compromised the efficiency of the  
121 remodeler’s escape from the regulatory pause phase, nor its ability to properly slide the nucleosome in  
122 the translocation phases. There are a number of ways that two enzymes could have the same overall  
123 remodeling rate when measured at the ensemble level and yet could differ at the single nucleosome  
124 level—e.g., [wt]-[wt] could have exhibited longer pauses but also larger step sizes—but this is not what  
125 we observe. Instead, covalently linking the two HSS domains of a SNF2h dimer has no effect on the  
126 two motors’ abilities to efficiently slide single nucleosomes, and so the [wt]-[wt] construct can be used  
127 to probe protomer coordination.

## 128 **2.2 Nucleosome sliding catalyzed by a constitutively dimeric SNF2h is more pro-** 129 **cessive than by wild-type SNF2h.**

130 A major advantage that smFRET has over ensemble assays for measuring nucleosome sliding is that  
131 smFRET can measure the *processivity* of the remodeling enzyme. We define processivity as the number  
132 of pause-translocation-pause-translocation cycles that the enzyme can catalyze before dissociating from  
133 the nucleosome, or, equivalently, how long the enzyme can continue to slide a nucleosome under chase  
134 conditions. Previous single molecule work with the ISWI remodeler ACF, a complex of SNF2h and the  
135 accessory subunit ACF1, showed that ACF is highly processive ([11]). We asked whether the same is  
136 true of the motor subunit alone, and whether the enzyme’s processivity is affected in the constitutively  
137 dimeric construct.

138 To quantify processivity, we generated nucleosomes initially positioned in the center of a long DNA,  
139 with 60 bp on each side (“60/60” nucleosomes; Fig. 2(A)). Although 60 bp is longer than SNF2h’s  
140 length sensitivity of 25-30 bp ([21, 31, 32, 33]), by an ensemble gel remodeling assay, almost 40% of  
141 the population of nucleosomes is still near the center of the DNA after the  $\sim$ 3-5 minutes we can image  
142 nucleosomes before the FRET dyes photobleach (Fig. S3(A)). The long flanking DNA ensures that  
143 the nucleosome remains sufficiently far from the surface of the microscope slide to prevent potential  
144 artifacts from nucleosome-surface interactions.

145 We measured remodeling of these 60/60 nucleosomes by SNF2h and [wt]-[wt] under chase conditions,  
146 by injecting enzyme and ATP into the sample chamber, allowing remodeling to commence, and then  
147 flushing the chamber with an excess of buffer containing ATP but no additional enzyme (see Methods).  
148 Any enzyme that dissociates from its substrate will experience near-infinite dilution into the large

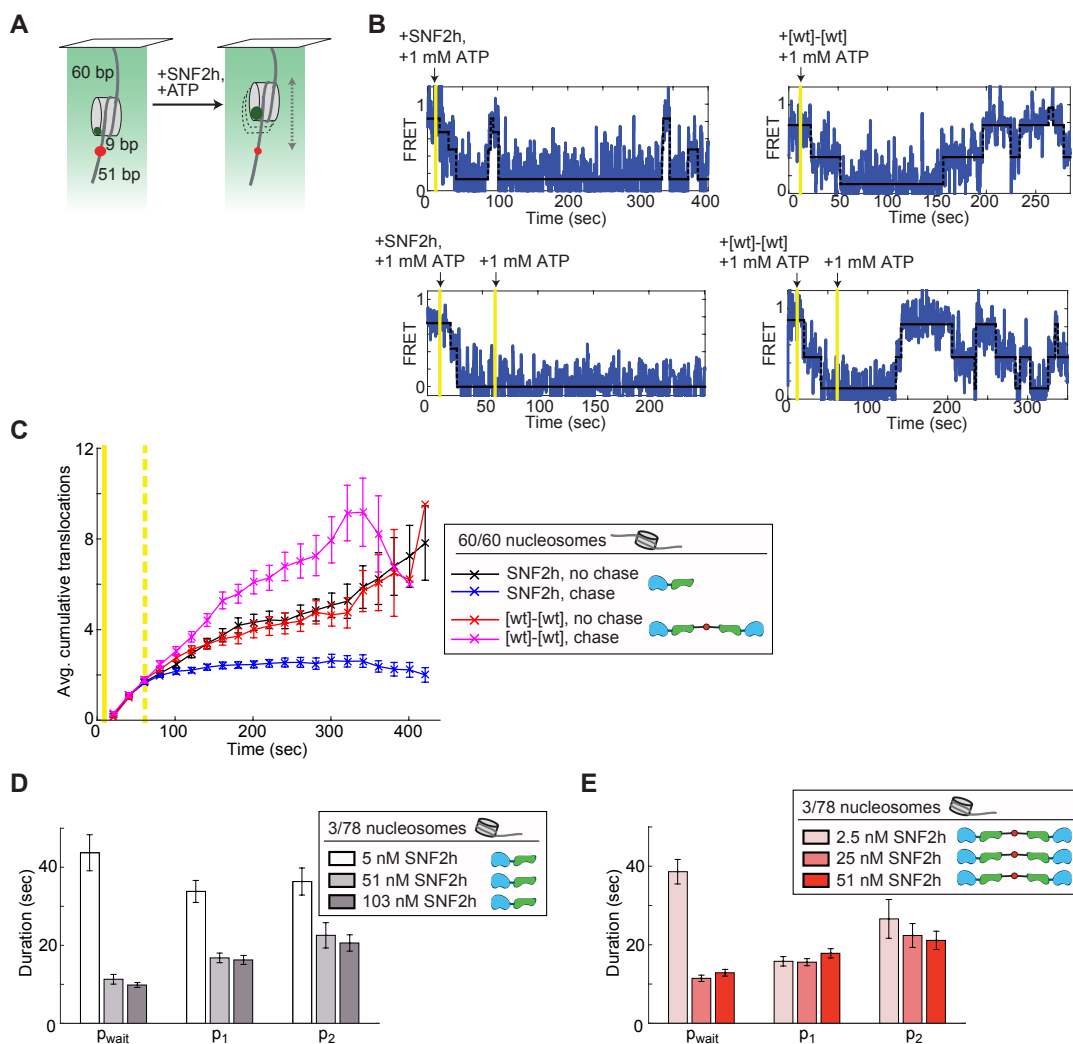

**Figure 2: A constitutively dimeric SNF2h exhibits increased processivity compared to wild type SNF2h.** (A) Schematic of the smFRET assay with initially centered 60/60 nucleosomes. (B) Example traces of SNF2h vs. [wt]-[wt] on 60/60 nucleosomes, without (top) or with (bottom) a 1 mM ATP chase about 1 minute after the first injection to start remodeling. [wt]-[wt] is significantly more likely to continue to remodel a nucleosome after a 1 mM ATP chase than is SNF2h, indicated by the repeated cycles of increasing and decreasing FRET in the bottom right trace. (C) Quantification of processivity of SNF2h vs. [wt]-[wt]. An accumulation of translocations over time indicates that remodeling continues. The error increases with time because fewer trajectories survive without photobleaching at longer time points. Solid vertical yellow line indicates injection of enzyme plus ATP; dashed vertical yellow line indicates the timepoint of the chase, if applicable. Enzyme concentrations here and in (B) were 103 nM SNF2h and 51 nM [wt]-[wt], with 1 mM ATP. See Fig. S4 for the cumulative translocations in individual traces that went into these averages. (D) Average durations of the first three pauses of the SNF2h remodeling reaction as a function of SNF2h concentration, for ~100 nucleosomes at each concentration. At subsaturating SNF2h (5 nM), the durations of all three pauses are longer, indicating that binding or re-binding of SNF2h becomes rate-limiting. (E) Average durations of the first three pauses of the [wt]-[wt] remodeling reaction as a function of [wt]-[wt] concentration, for ~100 nucleosomes at each concentration. Here only the first pause duration increases at the sub-saturating enzyme concentration, indicating that re-binding of [wt]-[wt] is not rate-limiting for the  $p_1$  and  $p_2$  pauses. ATP concentration here and in (D) was 1 mM. Errors were bootstrapped as described in the Methods.

149 volume of buffer above the surface-attached nucleosomes, and so any remodeling events after the second  
150 buffer exchange must be carried out by enzymes that remain bound to the nucleosome. A processive  
151 enzyme will remain bound and will continue to remodel the nucleosome after the chase.

152 As shown in Fig. 2(B), after the injection of saturating ATP and either saturating SNF2h or  
153 saturating [wt]-[wt] into the sample chamber (first yellow bar), the 60/60 nucleosomes are repeatedly  
154 slid back and forth along the DNA, moving in and out of FRET range. Remodeling was either allowed  
155 to proceed normally, or a chase was performed into 1 mM ATP alone, without enzyme (second yellow  
156 bar in bottom example trajectories), about 1 minute after the initial injection of remodeler and ATP  
157 to start the reaction.

158 Interestingly, we find that SNF2h alone, unlike the ACF complex, is not processive. As shown in  
159 Fig. 2(C), in the absence of the chase, SNF2h continues to remodel the 60/60 nucleosomes past the  
160 center of the DNA, and so translocation events continue to accumulate with time. However, under chase  
161 conditions, very few trajectories continue to accumulate new translocation events after the chase—that  
162 is, remodeling stops for most nucleosomes.

163 On the other hand, [wt]-[wt] *does* continue to remodel 60/60 nucleosomes even under chase con-  
164 ditions, as shown by the continued accumulation of transitions even under chase conditions (magenta  
165 curve in Fig. 2(C)). Thus by making a constitutively dimeric SNF2h, we have made it more processive,  
166 more like the ACF complex.

167 Given how low SNF2h's processivity is, does SNF2h dissociate from the nucleosome frequently,  
168 perhaps even after every pause-translocation cycle? To ascertain whether this is the case, we returned  
169 to the 3/78 nucleosome construct, for which more of the reaction is in FRET range, and asked how  
170 many of the pauses are sensitive to SNF2h concentration. Previous work with ACF showed that only  
171 the first pause is sensitive to enzyme concentration, meaning only the first pause has an enzyme binding  
172 event, consistent with ACF being highly processive ([11]).

173 As shown in Fig. 2(D), at a sub-saturating SNF2h concentration, all pause durations are longer  
174 than at saturating SNF2h, indicating that enzyme (re-)binding is rate-limiting for all pauses when  
175 SNF2h is sub-saturating. For [wt]-[wt], on the other hand, only the first pause is sensitive to enzyme  
176 concentration (Fig. 2(E)). Thus the SNF2h reaction can include a dissociation and re-binding event  
177 at every pause, whereas [wt]-[wt], like ACF, is highly processive and can catalyze multiple pause-  
178 translocation cycles without dissociating.

179 The possibility that SNF2h can dissociate from its substrate at every pause has implications for  
180 the step size. As discussed above, ISWI enzymes exhibit a stereotyped behavior in that the first  
181 translocation event moves the nucleosome about twice as far as the second translocation event. This  
182 means that SNF2h “remembers” that the first translocation event has been completed and the next  
183 translocation should be shorter. Is this memory retained at sub-saturating SNF2h, during which at  
184 least one SNF2h protomer can dissociate, and the complex must wait for another to re-bind?

185 As shown in Fig. S5, this memory is indeed retained even at sub-saturating concentrations of SNF2h.  
186 In particular, at sub-saturating concentrations of SNF2h, the second step does not get longer. If the  
187 memory of the first step were affected, we would expect the second step to be longer, more like the  
188 first step, or at least for there to be a population of nucleosomes with two long first-translocation-like  
189 steps. Instead, at sub-saturating SNF2h, the second step is, if anything, shorter than under saturating  
190 conditions. We speculate that at 5 nM SNF2h, one protomer remains bound to the nucleosome, and  
191 that one protomer alone can retain the memory of how far the next translocation event should slide  
192 the nucleosome. This memory could be enforced through the octamer distortion that we and others  
193 have recently described for ISWI enzymes ([16, 34, 35]), which is present even with a SNF2h monomer  
194 bound to the nucleosome ([16]).

195 In summary, although the [wt]-[wt] construct shares most features of the single-nucleosome remodel-  
196 eling reaction with SNF2h, the constitutive dimer is more processive, more like ACF. This increased  
197 processivity will be essential for constraining our model of protomer coordination by SNF2h after con-  
198 sidering several asymmetric mutants below, and has implications for the roles of accessory subunits in  
199 modulating SNF2h's activity, which will be addressed in the Discussion.

### 200 **2.3 ATP hydrolysis coordinates the length-sensing activities of the two SNF2h** 201 **motors.**

202 A fascinating observation from earlier smFRET studies with ISWI remodelers is that ATP is required  
203 for *both* the pause phases *and* the translocation phases of the remodeling reaction ([11, 12]). During the  
204 translocation phases, the enzyme is doing physical work to slide the nucleosome, and so a requirement  
205 for ATP hydrolysis makes sense. However, the role of ATP in the pauses remains unclear.

206 Since, as noted above, it is in the pause phases that the two SNF2h motors must jointly “decide”  
207 which direction to translocate the nucleosome, we speculated that ATP hydrolysis might be involved  
208 in protomer coordination. Of course, making a SNF2h mutant that is compromised in its ability  
209 to hydrolyze ATP cannot provide insight into this question, because such a mutant would have no  
210 remodeling activity at all. But with the constitutively dimeric [wt]-[wt] construct, we can mutate the  
211 ATPase domain of only one of the two protomers, and ask what effect such an asymmetric mutation  
212 has on nucleosome sliding. We call this construct [wt]-[WB], because one protomer has a mutation in  
213 the Walker B (WB) domain of the motor's active site that compromises ATP hydrolysis ([31]).

214 The simplest hypothesis for what we might observe with such an asymmetric mutant would be two  
215 populations of remodeled nucleosomes, depending on the initial binding orientation of the [wt]-[WB]  
216 construct. ~50% of a population of an end-positioned 3/78 nucleosomes should be bound by [wt]-  
217 [WB] such that the wild-type protomer can slide the nucleosome towards the longer flanking DNA. We  
218 would expect remodeling by this population to proceed normally, at least for the first several rounds of  
219 pauses and translocation events. The other half of the nucleosomes will be bound by [wt]-[WB] in an  
220 orientation in which the catalytically compromised protomer should be the one to slide the nucleosome.  
221 In the extreme case, this population would not remodel at all, at least until the enzyme dissociates and  
222 re-binds in the other orientation. As discussed in the previous section, dissociation by the constitutive  
223 dimer is quite slow. So at the single nucleosome level, we might observe a population of nucleosomes  
224 that is remodeled normally, and a population that remodels too slowly (if at all) to be observed by  
225 smFRET.

226 As shown in Fig. 3, this is not what we observe. The durations of the pauses with [wt]-[WB]  
227 are at least twice as long as with [wt]-[wt], while other aspects of the reaction are unaffected. This  
228 means that a catalytically compromised protomer has a dominant negative effect on the wild-type  
229 protomer, preventing efficient exit from the pauses, while leaving the actual process of nucleosome  
230 sliding unaffected. The slow dissociation rate of the constitutive dimer rules out a model in which  
231 pauses are longer with [wt]-[WB] due to a need to wait for the enzyme to dissociate and re-bind  
232 in a productive orientation during each pause. (However, the ability of the [wt]-[WB] construct to  
233 center a population of nucleosomes at the *ensemble* level in [31], albeit 5 times slower than [wt]-[wt],  
234 does require dissociation and re-binding such that the wild-type protomer can eventually slide all of  
235 the nucleosomes to the center of the DNAs. The processivity data in Fig. 2(C) are consistent with  
236 a dissociation rate on the timescale of the ensemble remodeling reactions of [31], since the rate of  
237 accumulation of translocations does decrease with time.)

238 In addition to pause durations, the step sizes with [wt]-[WB] differ slightly from those observed with



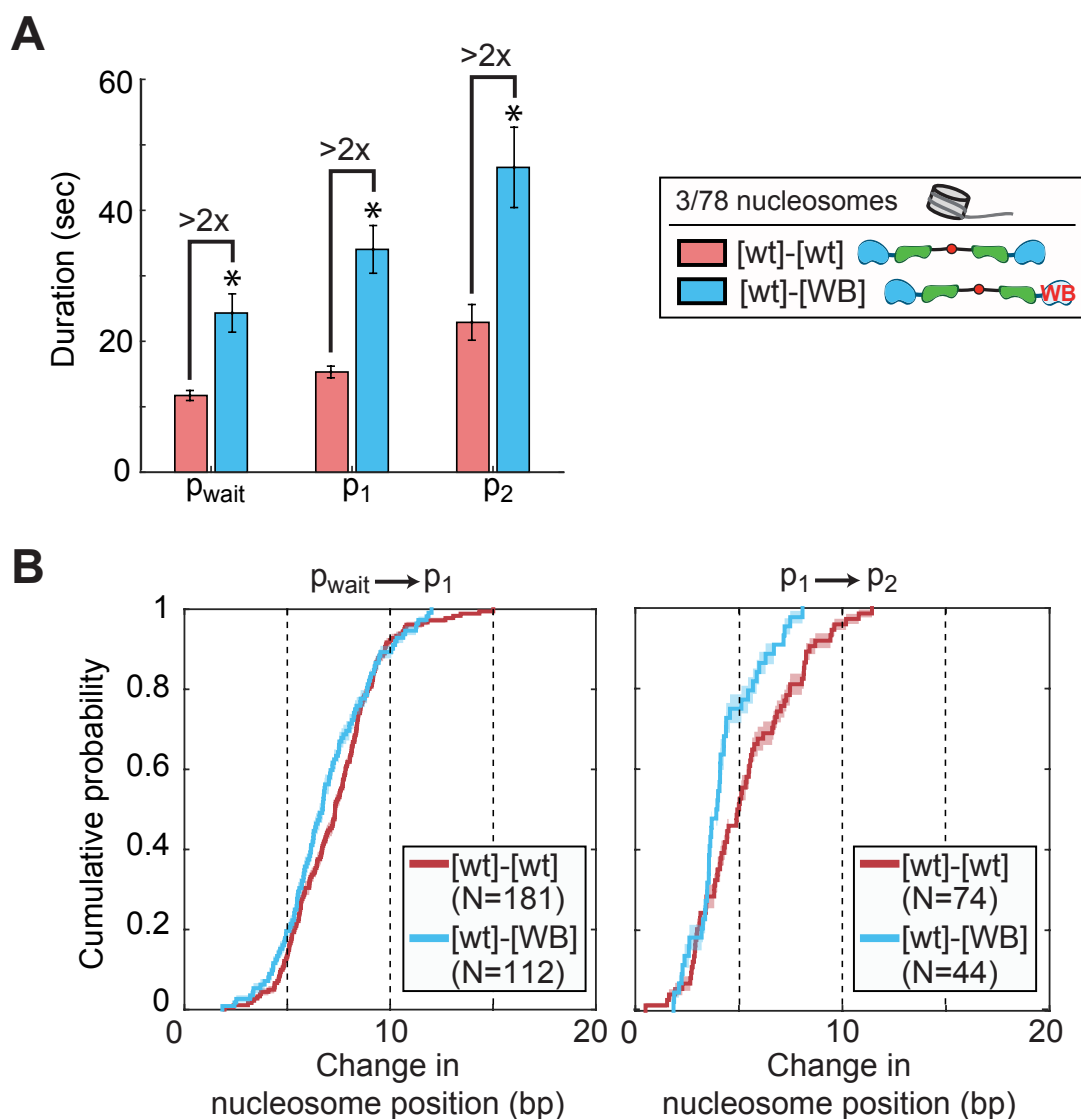

Figure 3: **ATP hydrolysis is required for the two motors to coordinate and avoid a tug of war.** (A) Average durations of the first three pauses when [wt]-[wt] or [wt]-[WB] remodels end positioned (3/78) nucleosomes, for  $\sim 100$  nucleosomes each. The asterisks indicate that these pause durations are lower bounds on the actual pause durations; the slow remodeling rate of [wt]-[WB] is masked by the rate of photobleaching (see Fig. S6 and [9]). (B) CDFs of the change in nucleosome position during the first (left) or second (right) translocation phases for [wt]-[wt] versus [wt]-[WB]. Mean step sizes for [wt]-[wt] are  $7.3 \pm 0.2$  and  $5.3 \pm 0.3$  bp for the first and second translocation phases respectively, and for [wt]-[WB] are  $6.9 \pm 0.2$  and  $4.2 \pm 0.2$  bp respectively. See Fig. S7 for corresponding step size KDEs. In all panels, enzyme concentrations are saturating (25 nM [wt]-[wt], 50 nM [wt]-[WB]); ATP concentration is also saturating (1 mM). Errors on the CDFs and mean step sizes are determined by a bootstrapping approach (see Methods).

239 [wt]-[wt]. Specifically, the second step is slightly shorter with [wt]-[WB] than with [wt]-[wt] (Fig. 3(B)).  
 240 However, the overall behavior of an initial large step followed by a step that moves the nucleosome  
 241 about half the distance of the first step is retained. This makes [wt]-[WB]'s step size different from the  
 242 altered step sizes that we previously observed with a mutation to the acidic patch on the nucleosomal  
 243 surface ([9]). Mutating the acidic patch, which also leads to longer pause durations, is so far the only

244 mutation that breaks the 7-8 bp first step, 3-5 bp second step pattern observed with all ISWI enzymes.  
245 It remains unclear why this pattern of step sizes is so robust and so highly conserved in these enzymes  
246 (and possibly conserved within the broader superfamily of remodelers, e.g. CHD4 [36]).

247 Returning to the question of protomer coordination, the longer pause durations with [wt]-[WB] sug-  
248 gest that the WB mutation does indeed affect this coordination: a catalytically compromised protomer  
249 can prevent its wild-type partner from efficiently exiting the pause phase and sliding the nucleosome.  
250 Since the two protomers are making a coordinated “decision” about which direction to slide the nucle-  
251 osome in response to the lengths of DNA flanking the nucleosome, we next introduced a mutation to  
252 abolish one protomer’s ability to sense flanking DNA. Specifically, we removed the HSS domain, the do-  
253 main of SNF2h that binds to and senses flanking DNA (Fig. 1(B)), from the catalytically compromised  
254 protomer, to make a construct called [wt]-[WB/ $\Delta$ HSS].

255 Surprisingly, the removal of the HSS from the catalytically compromised protomer restores wild-type  
256 pause durations (Fig. 4(A)), as well as wild-type step sizes (Fig. S7). So by removing the ability of the  
257 WB protomer to bind flanking DNA, we have restored normal remodeling behavior and eliminated the  
258 dominant negative effect of the WB mutation. This suggests that ATP hydrolysis by both protomers  
259 promotes their coordinated sensing of flanking DNA and efficient mobilization of the nucleosome.

260 Finally, we also generated a construct in which both protomers are wild-type for ATP hydrolysis,  
261 but only one protomer has a DNA-binding domain. This construct, called [wt]-[ $\Delta$ HSS], actually has  
262 slightly shorter pauses than [wt]-[wt], suggesting that when a protomer does not need to coordinate  
263 with its partner, it might be even more efficient at pause exit (Fig. 4(A)). All other features of the  
264 [wt]-[ $\Delta$ HSS] construct are wild-type (Fig. S7).

### 265 3 Discussion

266 Many chromatin remodeling enzymes that slide nucleosomes are regulated by the length of DNA  
267 flanking the nucleosome. Here we show that when a dimeric ISWI family remodeler has the capacity  
268 to sense flanking DNA on *both* sides of the nucleosome, ATP hydrolysis by both protomers is required  
269 to coordinate this dual DNA length sensing and to gate the nucleosome sliding reaction (Fig. 4(A)).

270 We previously described a large conformational change in SNF2h as a function of nucleotide state,  
271 and had speculated that this conformational change gates pause exit at the single-nucleosome level  
272 ([31]). Since the conformational change in SNF2h appears to coincide with ATP hydrolysis, we at-  
273 tributed the ATP dependence of the pause phases observed by smFRET to the ATP hydrolysis needed  
274 to promote the conformational change. The single-nucleosome resolution data presented here indicates  
275 an additional role for ATP hydrolysis during the pause phase. We therefore postulate that ATP hydroly-  
276 sis during the pause phase promotes movement of the HSS domain to allow partitioning between two  
277 outcomes: (1) the complete release of flanking DNA by the HSS, allowing the other protomer to take  
278 its turn, or (2) binding of the HSS domain to the nucleosome core, enabling a translocation-competent  
279 state ([31]). The first outcome ensures that neither protomer spends too long with its HSS bound to  
280 flanking DNA if it cannot undergo the conformational change to the translocation competent state.  
281 Prior work has indicated that under saturating conditions, ATP hydrolysis by ISWI enzymes increases  
282 with increasing flanking DNA length ([21, 37, 38]). We therefore further speculate that when the  
283 HSS is bound to the longer flanking DNA, ATP hydrolysis is more productive, partitioning a greater  
284 proportion of the enzyme to the translocation competent state.

285 In the model described above (Fig. 4(B)), the dominant negative effect of the WB mutation in one  
286 protomer is due to a stymying of outcome 1. When the HSS domain of the catalytically compromised  
287 protomer is bound to DNA, the system gets stuck in an unproductive state, in which the wild-type

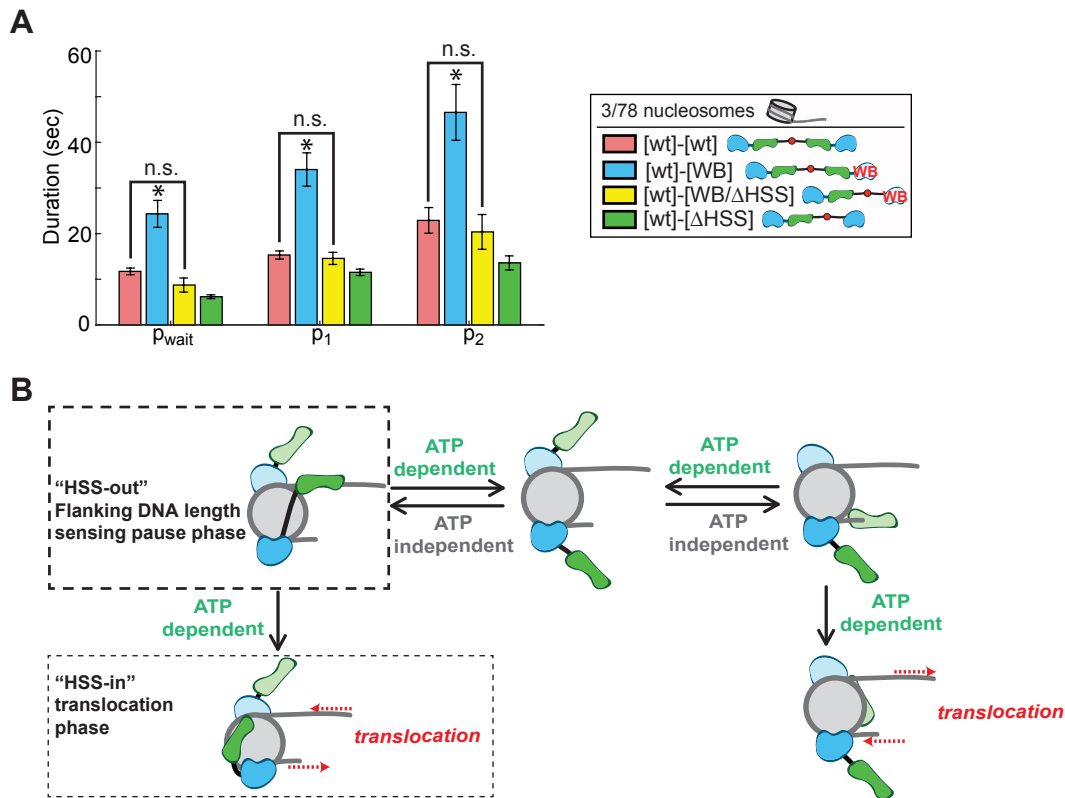

288 promoter is unable to bind the flanking DNA on its side of the nucleosome, hydrolyze ATP, undergo  
 289 the conformational change and slide the nucleosome. However, when the catalytically compromised  
 290 protomer does not have an HSS domain with which to bind flanking DNA, it cannot impede the  
 291 wild-type protomer, and so the [wt]-[WB/ΔHSS] construct remodels nucleosomes like [wt]-[wt].

292 In combination with previous studies, our results thus demonstrate that ATP is used not just to  
 293 physically slide the nucleosome in the translocation phase, but for at least two aspects of the *regulation*  
 294 of this sliding activity in the pause phases of the reaction ([11, 31, 12]). This use of ATP for regulation  
 295 is shared with at least one other family of remodelers, INO80 ([15]). It is interesting to speculate  
 296 about how this ATP requirement for regulation, not just activity, would impact a cell's control of its  
 297 chromatin state under limiting ATP conditions (John Tamkun, personal communication).

298 The directional nucleosome sliding exhibited by ISWI remodelers, regulated not just by flanking  
 299 DNA but by a comparative assessment of the relative lengths of DNA flanking both sides of a nucle-  
 300 some, is an important biological function implicated in the generation of evenly spaced nucleosome  
 301 arrays at TAD boundaries, heterochromatin regions, and in transcriptional regulation ([25, 27, 28, 23,  
 302 24, 39, 26]). Not only is this process tightly regulated, but it is also modulatable through the addition  
 303 of non-catalytic accessory subunits to form complexes with varying properties and, presumably, vary-

304 ing in vivo roles ([40]). For example, the Acf1 accessory subunit forms a complex with SNF2h that  
305 is sensitive to longer lengths of flanking DNA than SNF2h alone, but other complexes of SNF2h with  
306 different accessory subunits, such as Rsf1 (in the RSF complex), do not have the same DNA length  
307 sensitivity ([40]).

308 Similarly, we show here that the SNF2h motor subunit alone is not processive (Fig. 2), but the ACF  
309 complex is ([11]). If the Acf1 accessory subunit modulates the processivity of the motor subunit, it is  
310 possible that other accessory subunits that form complexes with SNF2h may modulate its processivity  
311 in other ways. While the ability to modulate the length of flanking DNA to which the enzyme is  
312 sensitive might change aspects of static structures that are generated (e.g., the precise nucleosome  
313 spacing achieved), modulating processivity changes the local *dynamics*. A highly processive enzyme will  
314 remain bound at a locus and continually slide the nucleosome back and forth, increasing, for example,  
315 the local DNA accessibility in the region to which that complex is targeted. The potential for ATP-  
316 dependent chromatin remodelers to mark active chromatin through specific nucleosome dynamics, not  
317 just through static chromatin structures, has been recently reviewed in [39]. Interestingly, the synthetic,  
318 constitutively dimeric [wt]-[wt] construct recapitulates the increased processivity of the ACF complex,  
319 without compromising the ability of the two motors to coordinate their activities. It is possible that  
320 the enhanced processivity of both ACF and [wt]-[wt] is due to a decrease in dissociation rate; ACF and  
321 [wt]-[wt] both have tighter affinities for nucleosomes than SNF2h alone ([31, 30, 29]).

322 SNF2h is a complex enzyme, with multiple “moving parts” (the HSS domain discussed here, as  
323 well as others [[9, 31]]), that carries out a tightly regulated nucleosome sliding reaction in response  
324 to flanking DNA on both sides of the nucleosome. By combining a biochemical system for generat-  
325 ing asymmetrically mutant dimers of SNF2h with the ability to watch these dimers remodel single  
326 nucleosomes, we can gain mechanistic insights that are difficult to obtain by ensemble enzymological  
327 approaches alone. smFRET assays have now been developed for members of all four major remodeler  
328 families ([15, 41, 11, 12, 13, 42, 14, 43, 36]), and we anticipate many exciting new avenues of inves-  
329 tigation for chromatin remodeling enzymes as this assay becomes part of the standard enzymological  
330 toolkit.

## 331 4 Methods and Materials

### 332 4.1 Nucleosome labeling and reconstitution.

333 Nucleosomal DNA was generated by PCR as in [15] and [9]. DNA sequences are shown in Fig. S1.  
334 HPLC-purified, biotinylated primers were purchased from IDT (Coralville, IA); HPLC-purified, Cy-  
335 nine5 SE end-labeled primers were purchased from TriLink Biotechnologies (San Diego, CA); and a  
336 PAGE-purified primer with an internal Cy5 for generating the 60/60 construct was purchased from  
337 IBA Life Sciences (Göttingen, Germany). All nucleosomes were assembled on the 601 nucleosome  
338 positioning sequence ([44]).

339 Recombinant *X. laevis* histones were expressed in and purified from *E. coli* as in [15] and [9].  
340 Histone octamer was assembled as in [15] and [9] with a 2:1 unlabeled:labeled H2A mixture, with  
341 the labeled H2A containing a Cy3 attached to an engineered cysteine at position 120 via cysteine-  
342 maleimide chemistry. The one endogenous cysteine at position 110 of histone H3 was mutated to an  
343 alanine. Nucleosomes were assembled from histone octamer and DNA by salt gradient dialysis over  
344 40-60 hours at 4°C, purified by glycerol gradient centrifugation, and quantified by native gel as in [15].

### 345 4.2 Remodeler purification.

346 Wild-type SNF2h was purified from *E. coli* as in [9]. The synthetically connected dimeric constructs  
347 were generated as in [31].

### 348 4.3 Native gel remodeling assay.

349 The remodeling reactions quantified by native gel in Fig. S3 were performed at 20°C under single  
350 turnover conditions (enzyme in excess of nucleosomes), with 15 nM 60/60 nucleosomes, and saturating  
351 enzyme (103 nM SNF2h or 51 nM [wt]-[wt]). Reactions were performed in 70 mM KCl, 1.41 mM MgCl<sub>2</sub>,  
352 0.02% NP-40, 12 mM HEPES-KOH (pH 7.5 at 20°C), 0.1 mM EDTA, and 7% glycerol. Reactions were  
353 assembled without ATP and incubated for 5 minutes at 20°C. Reactions were then initiated by the  
354 addition of ATP·Mg to a final concentration of 1 mM; timepoints were quenched in an equal volume  
355 of stop solution (0.6 mg/mL stop plasmid, 40 mM ADP, 16% glycerol). Timepoints were resolved  
356 by native PAGE (6% acrylamide, 0.5X TBE) and imaged on a Typhoon variable mode imager by  
357 scanning for Cy5 intensity. “% unremodeled” was quantified in ImageJ as the background-corrected  
358 intensity of the band that migrated at the same position as the nucleosomes alone lane, divided by the  
359 background-corrected intensity of the entire lane.

### 360 4.4 Ensemble FRET remodeling assay.

361 Ensemble FRET measurements were made on a K2 fluorimeter (ISS, Champaign, IL) by following the  
362 intensity of Cy5 over time (see also [15, 9]). Excitation and emission wavelengths were 515 nm and  
363 670 nm respectively, with a 550 nm short pass filter in the excitation path and a 535 nm long pass  
364 filter in the emission path. Emission intensities were measured every second.

365 All reactions were performed under single-turnover conditions with saturating enzyme and saturat-  
366 ing (1 mM) ATP at 20°C. Nucleosome concentrations were 7.5 nM; enzyme concentrations are given  
367 in figure legends. Reaction conditions were 12 mM HEPES-KOH, pH 7.5 at 22°, 70 mM KCl, 1.41 mM  
368 MgCl<sub>2</sub>, 7% glycerol, 0.02% Igepal (Spectrum Chemical I11112, New Brunswick, NJ), 0.1 mM EDTA,  
369 and 1 mM ATP·Mg. Remodeling was initiated by the addition of enzyme and ATP.

370 Cy5 intensities were normalized by fitting the unnormalized intensities to a two-phase exponential  
371 decay with 5 free parameters. In particular, the intensity of Cy5 at time  $t$ ,  $I(t)$ , was fit to

$$I(t) = I_{\min} + f_{\text{fast}}(I_{\max} - I_{\min})e^{-k_{\text{fast}}t} + (1 - f_{\text{fast}})(I_{\max} - I_{\min})e^{-k_{\text{slow}}t}, \quad (1)$$

372 where  $I_{\min}$  and  $I_{\max}$  are the minimum and maximum intensities respectively,  $k_{\text{fast}}$  and  $k_{\text{slow}}$  are the  
373 rate constants of the fast and slow phases of the reaction respectively, and  $f_{\text{fast}}$  is the fraction of the  
374 reaction in the fast phase. Cy5 intensities were then normalized to the fitted  $I_{\min}$  and  $I_{\max}$  values. The  
375 same fitting and normalization were performed on the “pseudoensemble” data in Fig. S6.

#### 376 4.5 Single molecule FRET assay.

377 smFRET measurements were performed as in [15], except that the SNF2h-specific buffers in [9] were  
378 used instead of the INO80 buffers in [15]. The final remodeling reaction conditions (Imaging Buffer)  
379 were 53 mM HEPES-KOH, pH 7.5 at 22°C, 9.1 mM Tris-acetate, pH 7.5 at 22°C, 63 mM KCl, 1.4 mM  
380 MgCl<sub>2</sub>, 10% glycerol, 0.1 mM EDTA, 0.02% Igepal, 1% glucose, 0.1 mg/mL acetylated BSA (Promega,  
381 Madison, WI), 2 mM Trolox (Sigma 238813), 0.03 mM  $\beta$ -mercaptoethanol, 2 U/ $\mu$ L catalase (Sigma  
382 E3289), and 0.08 U/ $\mu$ L glucose oxidase (Sigma G2133). Remodeling was initiated by the addition of  
383 ATP and enzyme at the concentrations indicated in figure legends using an automated syringe pump (J-  
384 KEM Scientific, St. Louis, MO). Images were collected using Micro-Manager ([www.micro-manager.org](http://www.micro-manager.org),  
385 San Francisco, CA) ([45]) at 7.4 Hz, with an exposure time of 100 ms. For the chase experiments for  
386 measuring processivity in Fig. 2, the chamber was flushed with a large volume (600  $\mu$ L) of Imaging  
387 buffer with 1 mM ATP but no enzyme, again using the automated syringe pump, 50 s after the first  
388 injection that initiates remodeling (see also [15]).

389 FRET-versus-time trajectories were extracted from microscope images using our custom Matlab  
390 software package, Traces (<https://github.com/stephlj/Traces>) ([15, 46]). Pause durations were quan-  
391 tified using a hidden semi-Markov model as in [15], through the adaptation of the pyhsmm python  
392 library (<https://github.com/mattjj/pyhsmm>) that accompanies the Traces software package.

393 As in [15] and [9], only nucleosomes that started in the higher-FRET, proximally-labeled cluster  
394 (see Fig. S2), and only those that exhibited single-step photobleaching of both dyes, were retained for  
395 further analysis. Except for data used to quantify processivity, only the portions of trajectories prior  
396 to any direction reversals and prior to the nucleosome being moved out of FRET range (defined as  
397 0.275 FRET) were retained for further analysis (quantification of pause durations, step size, etc).

398 All errors were estimated by bootstrapping over FRET-versus-time trajectories. For pause dura-  
399 tions, this means sampling all the trajectories in a dataset with replacement 1000 times, recomputing  
400 the average pause duration with this new sampled dataset, and then taking the standard deviation of  
401 these 1000 new means as the error. A similar process was used to estimate the error on step size CDFs.

402  
403 **Quantifying enzyme processivity.** To quantify enzyme processivity in Figs. 2 and S4, we counted  
404 the number of transitions between pause states as a function of time. A processive enzyme will continue  
405 to transition between pause states (that is, translocate the nucleosome to different positions along the  
406 DNA) even under chase conditions.

407 We count the total number of nucleosome translocations in a trajectory as the number of pause  
408 states minus one. We first quantified pauses by a hidden Markov model (HMM) using the pyhsmm  
409 package, as described above. We then hand-curated each trajectory to remove obviously spurious  
410 state transitions. This hand curation was necessary because these processivity experiments required  
411 measuring very long trajectories, which get assigned more noise states by the HMM (the longer a

trajectory, the more likely it will have noise events to which the HMM incorrectly assigns real states). Also, the position of the Cy5 dye at 9 bp outside of the nucleosome, rather than 3 bp, and the continual remodeling of the nucleosome in and out of FRET range, means that significant portions of these traces are at low FRET values, which tend to be inherently more noisy. The noise states that were removed were often of very short duration (several frames) and assigned nonsensically high or low FRET values by the HMM, and so were clearly spurious.

The cumulative number of nucleosome translocations was counted in 20-second intervals for each trajectory. Errors on the average cumulative translocations were estimated by a bootstrapping approach: trajectories in a dataset were resampled with replacement 1000 times, the cumulative number of nucleosome translocations at 20-second intervals was counted for each resampled dataset, and the standard deviation taken as the error.

**FRET-to-bp calibration.** The calibration that converts FRET values to base pairs of DNA that the nucleosome has been slid were performed as in [15], except that the Cy3 donor dye was on histone H2A at position 120 rather than on histone H3 at position 33. This different histone labeling position resulted in a different relationship between FRET and flanking DNA length (Fig. S2(A)). In fact, the relationship between FRET and  $n$ , the number of bp between the Cy5 label and the edge of the nucleosome, was so different that it was not well described by the expression used in [15] to fit the calibration curve data in that work.

In [15], we found that the best expression to relate FRET and  $n$  was

$$\text{FRET}(n) = \frac{1}{1 + \frac{(d_0^2 + 0.1156n^2 - 0.68d_0n \cos \theta)^3}{R_0^6}}, \quad (2)$$

where  $R_0$  is the Förster radius for Cy3-Cy5 in nm ([48, 47]) and  $d_0$ ,  $n$  and  $\theta$  are defined in Fig. S2(B). In [15], we also considered two variations on Eq. 2. First, because zero FRET is difficult to measure, we considered a constant offset,  $\text{FRET}_0$ , which gave the relationship

$$\text{FRET}(n) = \frac{1}{1 + \frac{(d_0^2 + 0.1156n^2 - 0.68d_0n \cos \theta)^3}{R_0^6}} + \text{FRET}_0. \quad (3)$$

However, because this significantly increases the number of free parameters, we reduced the dimensionality of the fit to one comparable to Eq. 2 by assuming that, given the geometry suggested by the crystal structure of the nucleosome,  $\theta \approx 90^\circ$ . In that case,

$$\text{FRET}(n) = \frac{1}{1 + \frac{(d_0^2 + 0.1156n^2)^3}{R_0^6}} + \text{FRET}_0. \quad (4)$$

| Fit to:    | $R_0$ (nm)    | $d_{0,\text{prox}}$ (nm) | $\theta_{\text{prox}}$ ( $^\circ$ ) | $\text{FRET}_{0,\text{prox}}$ | $d_{0,\text{dist}}$ (nm) | $\theta_{\text{dist}}$ ( $^\circ$ ) | $\text{FRET}_{0,\text{dist}}$ |
|------------|---------------|--------------------------|-------------------------------------|-------------------------------|--------------------------|-------------------------------------|-------------------------------|
| (expected) | $6^1$         | $\sim 2$                 | $> 90$                              |                               | $\sim 6$                 | $\sim 90$                           |                               |
| Eq. 2      | $13 \pm 1$    | $8 \pm 1$                | $180 \pm 12$                        | (N/A)                         | $11 \pm 1$               | $120 \pm 45$                        | N/A                           |
| Eq. 3      | $7 \pm 2$     | $5.3 \pm 0.8$            | $110 \pm 26$                        | $0.14 \pm 0.03$               | $6.8 \pm 0.9$            | $87 \pm 8$                          | $0.07 \pm 0.08$               |
| Eq. 4      | $5.7 \pm 0.3$ | $4.6 \pm 0.2$            | (90)                                | $0.16 \pm 0.03$               | $5.6 \pm 0.2$            | (90)                                | $0.17 \pm 0.02$               |

Table 1: Parameters obtained by fitting Eqs. 2, 3, or 4 to the calibration data in Fig. S2. Eq. 4 is the one used in this work. The “prox” and “dist” subscripts refer to the proximal and distal peaks in the FRET KDEs in Fig. S2(A). Errors are bootstrapped as described in the Methods. <sup>1</sup>[47].

438 In Fig. S2(C), we show that Eqs. 3 and 4 better describe the relationship between FRET and  $n$   
439 for the H2A-labeled nucleosomes used in this work. Fit parameters are given in Table 1; note that as  
440 in [15], we performed a global fit to the data for the proximal and distal FRET clusters, which have  
441 separate  $d_0$ ,  $\theta$ , and FRET<sub>0</sub> parameters, but share the same  $R_0$ . Errors on fit parameters were obtained  
442 by a bootstrapping routine as in [15].

443 Many of the fit parameters for Eqs. 3 and 4 are close to expected values and within error of each  
444 other. In particular, both  $\theta_{\text{prox}}$  and  $\theta_{\text{dist}}$  are within error of 90°, which would suggest Eq. 4 is the more  
445 reasonable expression. Finally, both expressions have essentially identical behaviors for the proximal  
446 FRET data between 3 and 25 bp, the range of values we care most about. Therefore we use Eq. 4 to  
447 convert between FRET and  $n$  in this work.

448 As in [15], we invert Eq. 4 to obtain

$$n(\text{FRET}) = 0.34^{-1} \sqrt{R_0^2 \left( \frac{1}{\text{FRET} - \text{FRET}_0} - 1 \right)^{1/3} - d_0^2}, \quad (5)$$

449 which we use to convert from measured FRET value to bp the nucleosome has been moved.

## 450 5 Acknowledgments

451 We thank Julia Tretyakova for histone purifications, the Narlikar lab for helpful discussions, Nathan  
452 Gamarra for advice on experimental design and on this manuscript, and Matthew Johnson for help  
453 with statistical analyses and adapting the pyhsmm package for our system. This work was supported  
454 by NIH grants to G.J.N. (R01GM073767 and R35 GM127020) and a Leukemia and Lymphoma Society  
455 Career Development Program Fellow award to S.L.J.

## 456 References

- 457 [1] C.R. Clapier and B.R. Cairns. The biology of chromatin remodeling complexes. *Annu Rev*  
458 *Biochem*, 78:273–304, 2009.
- 459 [2] K.B. Falbo and X. Shen. Chromatin remodeling in DNA replication. *J Cell Biochemistry*, 97:684–  
460 689, 2006.
- 461 [3] H. van Attikum and S. M. Gasser. ATP-dependent chromatin remodeling and DNA double-strand  
462 break repair. *Cell Cycle*, 4:1011–1014, 2005.
- 463 [4] C.Y. Zhou, S.L. Johnson, N.I. Gamarra, and G.J. Narlikar. Mechanisms of ATP-dependent chro-  
464 matin remodeling motors. *Annu Rev Biophys*, 45:153–81, 2016.
- 465 [5] A.P. Bracken, G.L. Brien, and C.P. Verrijzer. Dangerous liaisons: interplay between SWI/SNF,  
466 NuRD, and Polycomb in chromatin regulation and cancer. *Genes Dev*, 33:1–24, 2019.
- 467 [6] C. Kadoch, D.C. Hargreaves, C. Hodges, L. Elias, L. Ho, J. Ranish, and G.R. Crabtree. Proteomic  
468 and bioinformatic analysis of mammalian SWI/SNF complexes identifies extensive roles in human  
469 malignancy. *Nat Genet*, 45:592–601, 2013.
- 470 [7] L.S. Blok, J. Rousseau, J. Twist, and et al. CHD3 helicase domain mutations cause a neurodevel-  
471 opmental syndrome with macrocephaly and impaired speech and language. *Nat Comm*, 9:1–12,  
472 2018.



- 473 [8] C. Kadoch and G.R. Crabtree. Mammalian SWI/SNF chromatin remodeling complexes and cancer: mechanistic insights gained from human genomics. *Sci Adv*, 1:e1500447, 2015.  
474
- 475 [9] N. Gamarra, S.L. Johnson, M.J. Trnka, A.L. Burlingame, and G.J. Narlikar. The nucleosomal  
476 acidic patch relieves auto-inhibition by the ISWI remodeler SNF2h. *eLIFE*, 7:e35322, 2018.
- 477 [10] B.R. Cairns. Chromatin remodeling: insights and intrigue from single-molecule studies. *Nat.*  
478 *Struct. Mol. Biol.*, 14:989–996, 2007.
- 479 [11] T.R. Blosser, J.G. Yang, M.D. Stone, G.J. Narlikar, and X. Zhuang. Dynamics of nucleosome  
480 remodeling by individual ACF complexes. *Nature*, 462:1022–1027, 2009.
- 481 [12] S. Deindl, W.L. Hwang, S.K. Hota, T.R. Blosser, P. Prasad, B. Bartholomew, and X. Zhuang.  
482 ISWI remodelers slide nucleosomes with coordinated multi-base-pair entry steps and single-base-  
483 pair exit steps. *Cell*, 152:442–452, 2013.
- 484 [13] W.L. Hwang, S. Deindl, B.T. Harada, and X. Zhuang. Histone H4 tail mediates allosteric regulation  
485 of nucleosome remodelling by linker DNA. *Nature*, 512:213–217, 2014.
- 486 [14] B.T. Harada, W.L. Hwang, S. Deindl, N. Chatterjee, B. Bartholomew, and X. Zhuang. Stepwise  
487 nucleosome translocation by RSC remodeling complexes. *eLIFE*, 5:e10051, 2016.
- 488 [15] C.Y. Zhou, S.J. Johnson, L.J. Lee, A.D. Longhurst, S.L. Beckwith, M.J. Johnson, A.J. Morrison,  
489 and G.J. Narlikar. The yeast INO80 complex operates as a tunable DNA length-sensitive switch  
490 to regulate nucleosome sliding. *Mol Cell*, 69:677–688, 2018.
- 491 [16] J.-P. Armache, N. Gamarra, S.L. Johnson, J.D. Leonard, S. Wu, G.J. Narlikar, and Y. Cheng.  
492 Cryo-EM structures of remodeler-nucleosome intermediates suggest allosteric control through the  
493 nucleosome. *eLIFE*, 8:e46057, 2019.
- 494 [17] M. Li, X. Xia, Y. Tian, Q. Jia, X. Liu, Y. Lu, M. Li, X. Li, and Z. Chen. Mechanism of DNA  
495 translocation underlying chromatin remodeling by Snf2. *Nature*, 567:409–413, 2019.
- 496 [18] A. Sabantsev, R.F. Leventosky, X. Zhuang, G.D. Bowman, and S. Deindl. Direct observation  
497 of coordinated DNA movements on the nucleosome during chromatin remodeling. *Nat Comm*,  
498 10:1–12, 2019.
- 499 [19] J.N. McKnight, K.R. Jenkins, I.M. Nodelman, T. Escobar, and G.D. Bowman. Extranucleosomal  
500 DNA binding directs nucleosome sliding by Chd1. *Mol Cell Biol*, 31:4746–4759, 2011.
- 501 [20] G. Längst, E.J. Bonte, D.F.V. Corona, and P.B. Becker. Nucleosome movement by CHRAC and  
502 ISWI without disruption or *trans*-displacement of the histone octamer. *Cell*, 97:843–852, 1999.
- 503 [21] J.G. Yang, T.S. Madrid, E. Sevastopoulos, and Narlikar. G.J. The chromatin-remodeling enzyme  
504 ACF is an ATP-dependent DNA length sensor that regulates nucleosome sliding. *Nat Struct Mol*  
505 *Biol*, 13:1078–1083, 2006.
- 506 [22] L.L. Wallrath and S.C. Elgin. Position effect variegation in *Drosophila* is associated with an  
507 altered chromatin structure. *Genes Dev*, 15:1263–1277, 1995.

- 508 [23] D.V. Fyodorov, M.D. Blower, G.H. Karpen, and J.T. Kadonaga. Acf1 confers unique activities  
509 to ACF/CHRAC and promotes the formation rather than disruption of chromatin in vivo. *Genes*  
510 *Dev*, 18:170–183, 2004.
- 511 [24] A. Scacchetti, L. Brueckner, D. Jain, T. Schauer, X. Zhang, F. Schnorrer, B. van Steensel,  
512 T. Straub, and P.B. Becker. CHRAC/ACF contribute to the repressive ground state of chro-  
513 matin. *Life Sci Alliance*, 1:e201800024, 2018.
- 514 [25] N. Wiechens, V. Singh, T. Gkikopoulos, P. Schofield, S. Rocha, and T. Owen-Hughes. The chro-  
515 matin remodelling enzymes SNF2H and SNF2L position nucleosomes adjacent to CTCF and other  
516 transcription factors. *PLoS Genet*, 12:e1005940, 2016.
- 517 [26] F.L. Sun, M.H. Cuaycong, and S.C. Elgin. Long-range nucleosome ordering is associated with gene  
518 silencing in *Drosophila melanogaster* pericentric heterochromatin. *Mol Cell Biol*, 21:2867–2879,  
519 2001.
- 520 [27] M. Li, A. Hada, P. Sen, L. Olufemi, M.A. Hall, B.Y. Smith, S. Forth, J.N. McKnight, A. Patel,  
521 G.D. Bowman, B. Bartholomew, and M.D. Wang. Dynamic regulation of transcription factors by  
522 nucleosome remodeling. *eLIFE*, 4:e06249, 2015.
- 523 [28] T.G. Fazio and T. Tsukiyama. Chromatin remodeling in vivo: evidence for a nucleosome sliding  
524 mechanism. *Mol Cell*, 12:1333–1340, 2003.
- 525 [29] X. He, H.-Y. Fan, G.J. Narlikar, and R.E. Kingston. Human ACF1 alters the remodeling strategy  
526 of SNF2h. *J Biol Chem*, 281:28636–28647, 2006.
- 527 [30] L.R. Racki, J.G. Yang, N. Naber, P.D. Partensky, A. Acevedo, T.J. Purcell, R. Cooke, Y. Cheng,  
528 and Narlikar. G.J. The chromatin remodeller ACF acts as a dimeric motor to space nucleosomes.  
529 *Nature*, 462:1016–1021, 2009.
- 530 [31] J.D. Leonard and G. Narlikar. An ATP-driven switch imposes flanking DNA length sensitivity on  
531 a dimeric chromatin remodeler. *Mol Cell*, 57:850–859, 2015.
- 532 [32] T. Grune, J. Brzeski, A. Eberharter, C.R. Clapier, D.F. Corona, P.B. Becker, and C.W. Müller.  
533 Crystal structure and functional analysis of a nucleosome recognition module of the remodeling  
534 factor ISWI. *Mol Cell*, 12:449–460, 2003.
- 535 [33] W. Dang and B. Bartholomew. Domain architecture of the catalytic subunit in the ISW2-  
536 nucleosome complex. *Mol Cell Biol*, 27:8306–8317, 2007.
- 537 [34] K. Sinha, J.D. Gross, and G.J. Narlikar. Distortion of histone octamer core promotes nucleosome  
538 mobilization by a chromatin remodeler. *Science*, 355:eaaa3761, 2017.
- 539 [35] A. Hada, S.K. Hota, J. Luo, Y.-C. Lin, S. Kale, A.K. Shaytan, S.K. Bhardwaj, J. Persinger,  
540 J. Ranish, A.R. Panchenko, and B. Bartholomew. Histone octamer structure is altered early in  
541 ISW2 ATP-dependent nucleosome remodeling. *Cell Reports*, 28:282–294, 2019.
- 542 [36] Y. Zhong, B.P. Paudel, D.P. Ryan, J.K.K. Low, C. Franck, K. Patel, M.J. Bedward, M. Torrado,  
543 R. J. Payne, A.M. van Oijen, and J.P. Mackay. CHD4 slides nucleosomes by decoupling entry-  
544 and exit-side DNA translocation. *Nat Comm*, 11:1–14, 2020.

- 545 [37] M. Zofall, J. Persinger, and B. Bartholomew. Functional role of extranucleosomal DNA and the  
546 entry site of the nucleosome in chromatin remodeling by ISW2. *Mol Cell Biol*, 24:10047–10057,  
547 2004.
- 548 [38] I. Whitehouse, C. Stockdale, A. Flaus, M.D. Szczelkun, and T. Owen-Hughes. Evidence for DNA  
549 translocation by the ISWI chromatin-remodeling enzyme. *Mol Cell Biol*, 23:1935–1945, 2003.
- 550 [39] S. Brahma and S. Henikoff. Epigenome regulation by dynamic nucleosome unwrapping. *Trends*  
551 *Biochem Sci*, 45:13–26, 2020.
- 552 [40] M. Oppikofer, T. Bai, Y. Gan, B. Haley, P. Liu, W. Sandoval, C. Ciferri, and A.G. Cochran.  
553 Expansion of the ISWI chromatin remodeler family with new active complexes. *EMBO Rep*,  
554 18:1697–1706, 2017.
- 555 [41] M. Schwarz, K. Schall, E. Kallis, S. Eustermann, M. Guariento, M. Moldt, K.P. Hopfner, and  
556 J. Michaelis. Single-molecule nucleosome remodeling by INO80 and effects of histone tails. *FEBS*  
557 *Lett*, 592:318–331, 2018.
- 558 [42] S. Deindl and X. Zhuang. Monitoring conformational dynamics with single-molecule fluorescence  
559 energy transfer: applications in nucleosome remodeling. *Methods Enzymol*, 513:59–86, 2012.
- 560 [43] Y. Qiu, R.F. Levandosky, S. Chakravarthy, A. Patel, G.D. Bowman, and S. Myong. The Chd1  
561 chromatin remodeler shifts nucleosomal DNA bidirectionally as a monomer. *Mol Cell*, 68:76–88,  
562 2017.
- 563 [44] P.T. Lowary and J. Widom. New DNA sequence rules for high affinity binding to histone octamer  
564 and sequence-directed nucleosome positioning. *J Mol Biol*, 276:19–42, 1998.
- 565 [45] A.D. Edelstein, M.A. Tsuchida, N. Amodaj, H. Pinkard, R.D. Vale, and N. Stuurman. Advanced  
566 methods of microscope control using  $\mu$ Manager software. *J Biol Methods*, 1:e11, 2014.
- 567 [46] S.L. Johnson, M.J. Johnson, L.A. Breuer, and G.J. Narlikar. Traces: single molecule FRET  
568 analysis code. v.0.5.0. *Github*, a9d4fac, 2018.
- 569 [47] M.C. Murphy, I. Rasnik, W. Cheng, T.M. Lohman, and T. Ha. Probing single-stranded DNA  
570 conformational flexibility using fluorescence spectroscopy. *Biophys J*, 86:2530–2537, 2004.
- 571 [48] L. Stryer and R.P. Haugland. Energy transfer: a spectroscopic ruler. *Proc. Nat. Acad. Sci.*,  
572 58:719–726, 1967.

## 573 6 Supplemental Figures.

```
"3/78":
5' - /5Cy5 /GCCCTGGAGAATCCCGGTCTGCAGGCCGCTCAATTGGTCGTAGACAGCTCTAGCACCGCTTAAACGCACGTACGCGCTGTCCCCGCGTTTTAACCG...
3' -      CCGGACCTCTTAGGGCCAGACGTCCGGCGAGTTAACCAGCATCTGTCGAGATCGTGGCGAATTTGCGTGATGCGCGACAGGGGGCGAAAAATTGGC...

...CCAAGGGGATTACTCCCTAGTCTCCAGGCAGTGTGATATATACATCCTGTGCATCTATTGAACAGCGACCTTGCCGGTGCCAGTCGGATAGTGTCCGAG...
...GGTCCCCTAATGAGGGATCAGAGGTCCGTGCACAGTCTATATATGTAGGACACGTAGATAACTTGTGCTGGAACGGCCACGGTCAGCCTATCACAAGGCTC...

...CTCCACTCTAGAGGATCCCCGGTACC-3'
...GAGGGTGAGATCTCCTAGGGGCCCATGG/5Bioteg/-5'

"60/60":
5' - AAAGCATGATTCTTACACCGAGTTCATCCCTTATGTGATGGACCCCTATAC*T*CGGCCGCCCTGGAGAATCCCGGTCTGCAGGC...
3' - TTTCGTACTAAGAAGTGTGGCTCAAGTAGGGAATACACTACCTGGGATATG C GCCGGCGGACCTCTTAGGGCCAGACGTCCG...

...CGCTCAATTGGTCGTAGACAGCTCTAGCACCGCTTAAACGCACGTACGCGCTGTCCCCGCGTTTTAACCGCCAAGGGGATTACTCCCTAGTCTCCAGGCAG...
...GCGAGTTAACAGCATCTGTCGAGATCGTGGCGAATTTGCGTGATGCGCGACAGGGGGCGAAAAATTGGCGGTTCCCCTAATGAGGGATCAGAGGTCCGTC...

...TGTGAGATATATACATCCTGTGATCTATTGAACAGCGACCTTGCCGGTGCCAGTCGGATAGTGTCCGAGCTCCCACTCT-3'
...ACAGTCTATATATGTAGGACACGTAGATAACTTGTGCTGGAACGGCCACGGTCAGCCTATCACAAGGCTCGAGGGTGAGA/5Bioteg/-5'
```

Figure S1: **Supplement to Fig. 1: DNA sequences used in this work.** Sequences of nucleosomes that start end-positioned (“3/78”, top) or centered (“60/60”, bottom). The 601 positioning sequence ([44]) is underlined. A Pst1 restriction site has been engineered into the 601 sequence 18 bp from one end, shown in bold blue letters. The base with an internal Cy5 label in the 60/60 construct is flanked by asterisks. DNAs used for the calibration curve (Fig. S2) were generated by adding bp to the Cy5-labeled short end of the 3/78 construct, using the same sequence as in the 60/60 construct; see also [15].

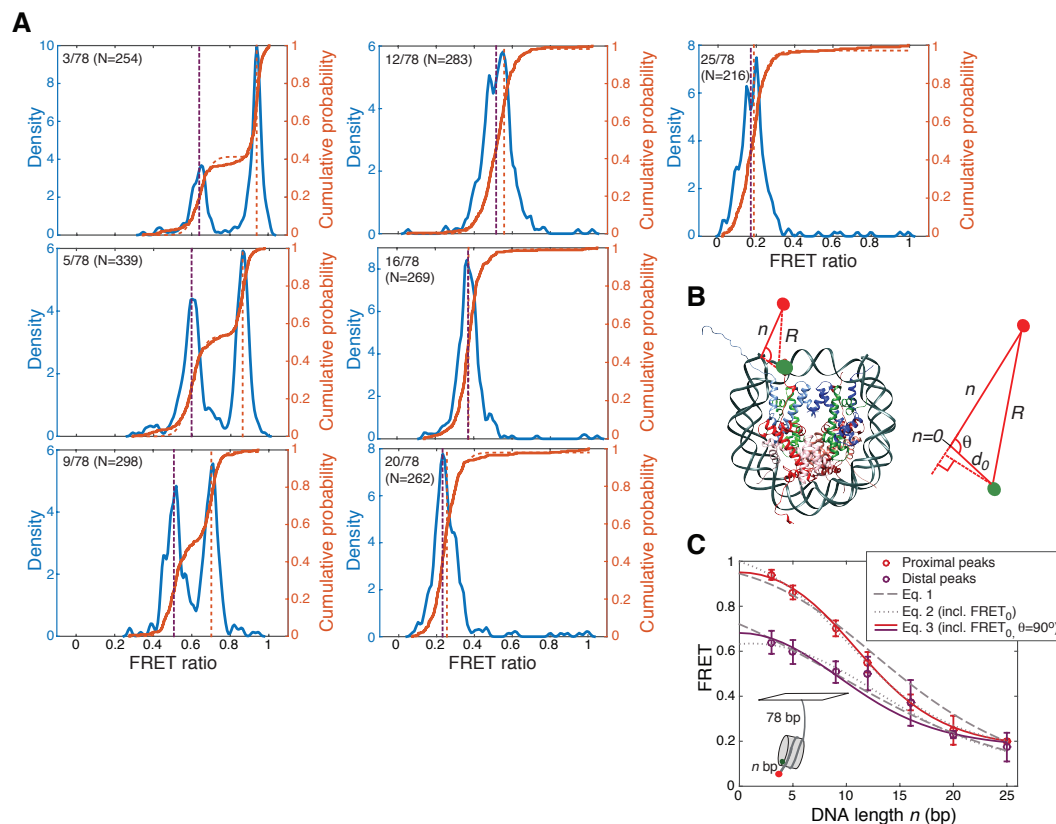

Figure S2: **Supplement to Fig. 1:** (A) FRET values of the nucleosome constructs used to generate calibration data for converting FRET to bp of DNA moved out of the nucleosome. Constructs are labeled as  $n/78$ , with  $3 \leq n \leq 25$  bp on one side of the nucleosome, and 78 bp on the other (see schematic in (C)).  $N$  is the number of nucleosomes in each data set. Blue curves are KDEs with bandwidth 0.01; solid orange curves are corresponding empirical CDFs; dashed orange curves are fits to a Gaussian mixture model for identifying peak positions and widths. FRET values for nucleosomes cluster into two populations, a “proximal” population, in which Cy3 is on the H2A closest to the Cy5 label (as in (B)), and a “distal” population, in which the other H2A is labeled, resulting in a lower FRET value because the dyes are further apart. Nucleosomes with neither or both H2A’s labeled are excluded. See [15] for more details. (B) Parameters used in derived calibration curve models.  $n$  is the number of bp of DNA between the edge of the nucleosome and the Cy5 label,  $R$  is the distance between the Cy3 and Cy5 dyes in three dimensions,  $d_0$  is the distance between the dyes when  $n = 0$ , and  $\theta$  is the angle between  $d_0$  and the flanking DNA. (C) Fits of Eqs. 2, 3, and 4 to FRET values of proximally and distally labeled nucleosomes, as a function of  $n$ . Fit parameters are given in Table 1. Errors on the data are standard deviations from fits of Gaussian mixture models to the CDFs of FRET values for each nucleosome construct in (A).

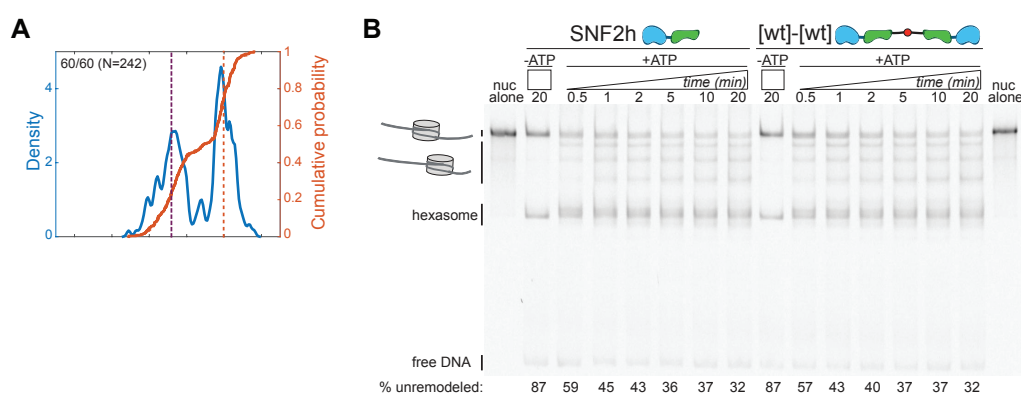

Figure S3: **Supplement to Fig. 2:** (A) KDE and CDF of starting FRET values for the 60/60 nucleosomal construct (see Fig. S2(A)). (B) Gel remodeling of 60/60 nucleosomes by 103 nM SNF2h or 51 nM [wt]-[wt], with 1 mM ATP. After 5 minutes, ~40% of the nucleosome population is still centered (the smFRET reaction is maximally ~6 min, due to photobleaching). Note that SNF2h and [wt]-[wt] have the same product distributions on 60/60, indicating that although [wt]-[wt] might be more processive on these nucleosomes like ACF, it does not have the enhanced length sensitivity of ACF (ACF would keep these nucleosomes centered ([29])).

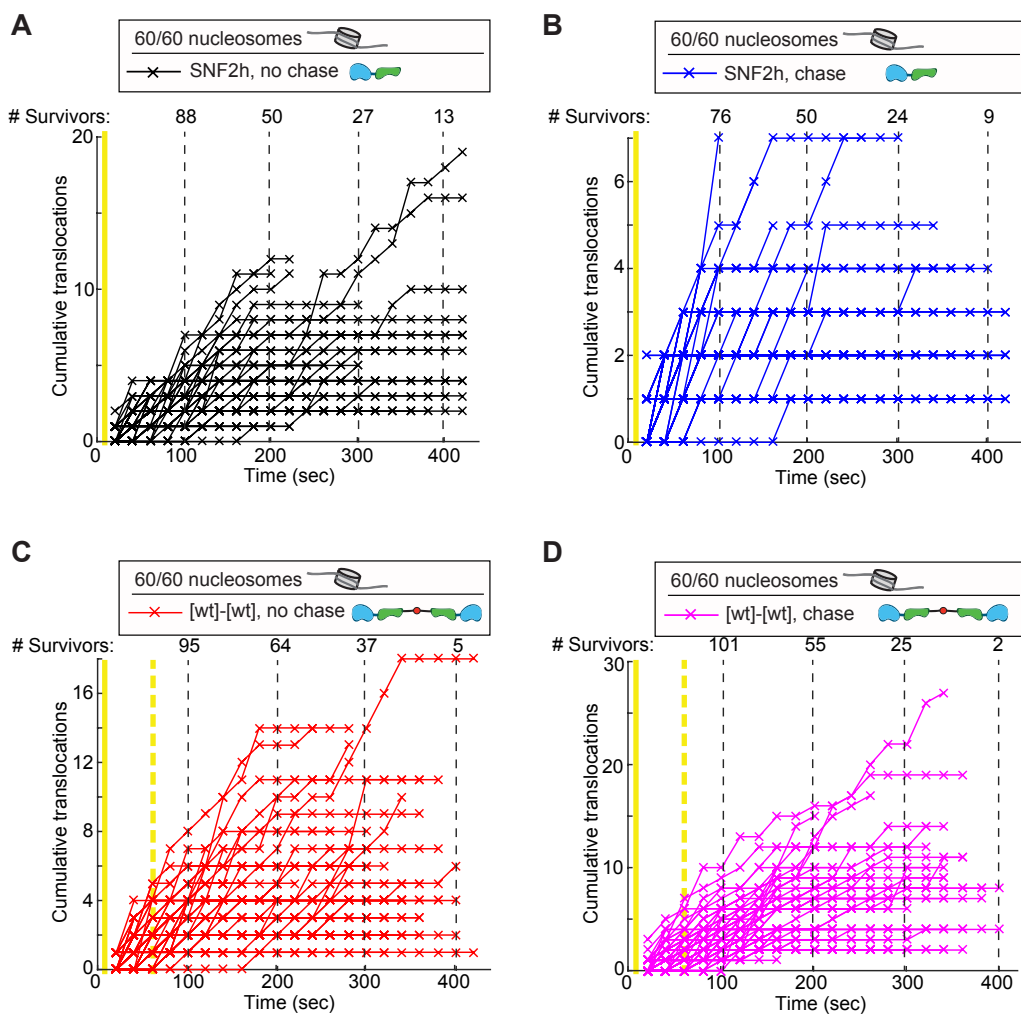

Figure S4: **Supplement to Fig. 2:** Cumulative translocations in individual trajectories for (A) SNF2h, no chase, (B) SNF2h, with chase, (C) [wt]-[wt], no chase, and (D) [wt]-[wt], with chase. Each panel has a different  $y$ -axis scale. “# Survivors”: Number of trajectories at each indicated time point that have not photobleached; for example, the SNF2h, no chase sample starts with 103 trajectories, but after 400 seconds, all but 13 trajectories have photobleached. See Fig. 2 for conditions.

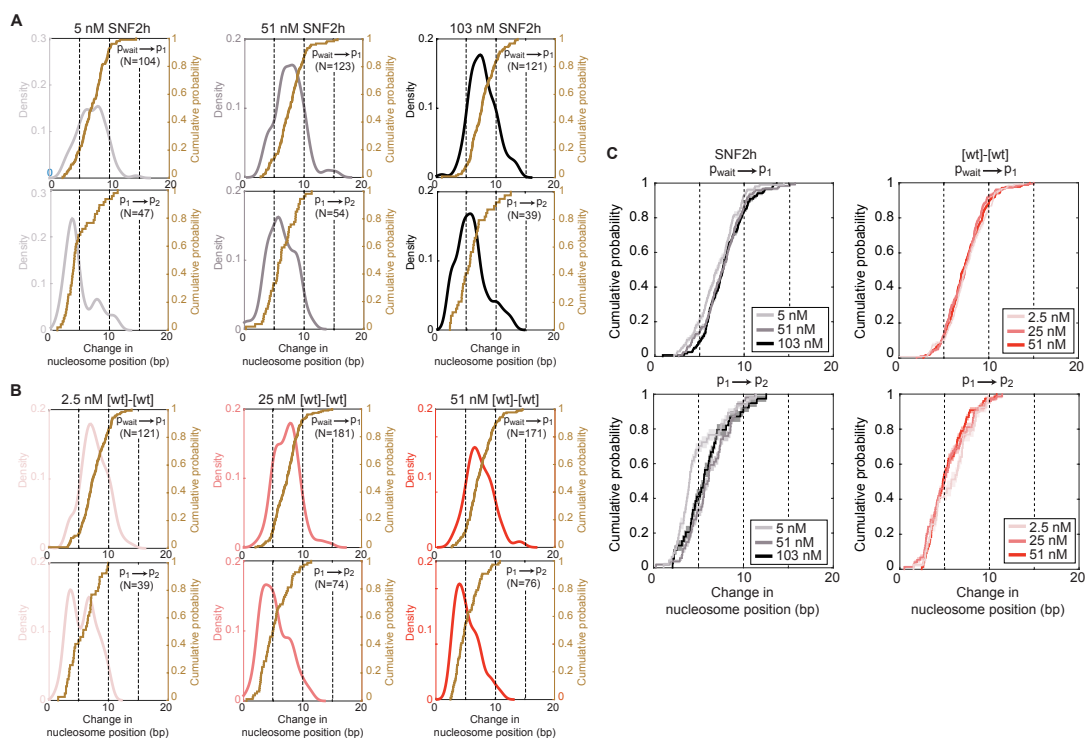

Figure S5: **Supplement to Fig. 2:** Translocation step sizes of SNF2h and [wt]-[wt] at saturating versus subsaturating enzyme concentrations (and 1 mM ATP). (A,B) KDEs of translocation step sizes, with corresponding CDFs overlaid, for varying concentrations of SNF2h (A) or [wt]-[wt] (B). See Fig. 1(D) for a description of these plots. N: number of remodeling events included in the KDE and CDF. KDE bandwidths are 0.75. (C) Overlaid CDFs for the first (top) or second (bottom) translocation events, at the varying concentrations in (A). Mean step sizes for first and second translocations respectively are:  $7.0 \pm 0.2$  bp and  $4.8 \pm 0.4$  bp for 5 nM SNF2h;  $7.6 \pm 0.2$  bp and  $6.2 \pm 0.3$  bp for 51 nM SNF2h;  $7.8 \pm 0.2$  bp and  $5.8 \pm 0.4$  bp for 103 nM SNF2h;  $7.5 \pm 0.2$  bp and  $5.7 \pm 0.4$  bp for 2.5 nM [wt]-[wt];  $7.3 \pm 0.2$  bp and  $5.3 \pm 0.3$  bp for 25 nM [wt]-[wt];  $7.4 \pm 0.2$  and  $5.3 \pm 0.2$  bp for 51 nM [wt]-[wt].



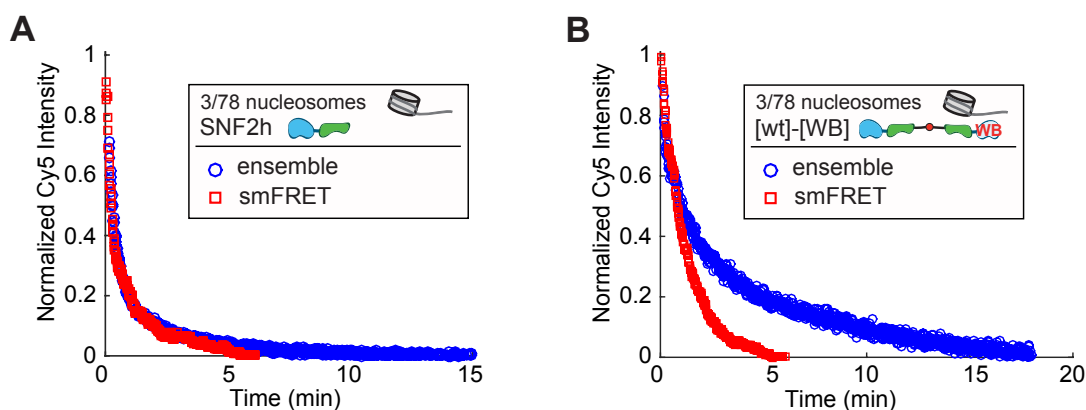

Figure S6: **Supplement to Fig. 4:** (A) Ensemble FRET remodeling data (measured as the decrease in overall sample Cy5 intensity as a function of time; blue data), compared to a “pseudoensemble” measure of the overall remodeling rate by single-molecule FRET (red data), for 103 nM SNF2h plus 1 mM ATP. The “pseudoensemble” data are the summed Cy5 intensities of all surface-attached nucleosomes in the indicated single molecule data set, binned in 1-second intervals to simulate the measurement of ensemble Cy5 intensities. Consistent with previous work, the overall remodeling rates measured by smFRET and by ensemble FRET are comparable ([11, 13]). (B) Same as (A) but for 50 nM of the [wt]-[WB] construct. Here, the overall reaction rates measured by ensemble FRET versus smFRET are not the same; in particular, the smFRET rate appears faster than the ensemble rate. As in our previous work with acidic patch mutant nucleosomes ([9]), this discrepancy is due to photobleaching in the smFRET reaction, which masks slowly remodeled nucleosomes. Thus the pause durations reported for the [wt]-[WB] construct in Figs. 3 and 4 are a lower bound on the actual pause durations.

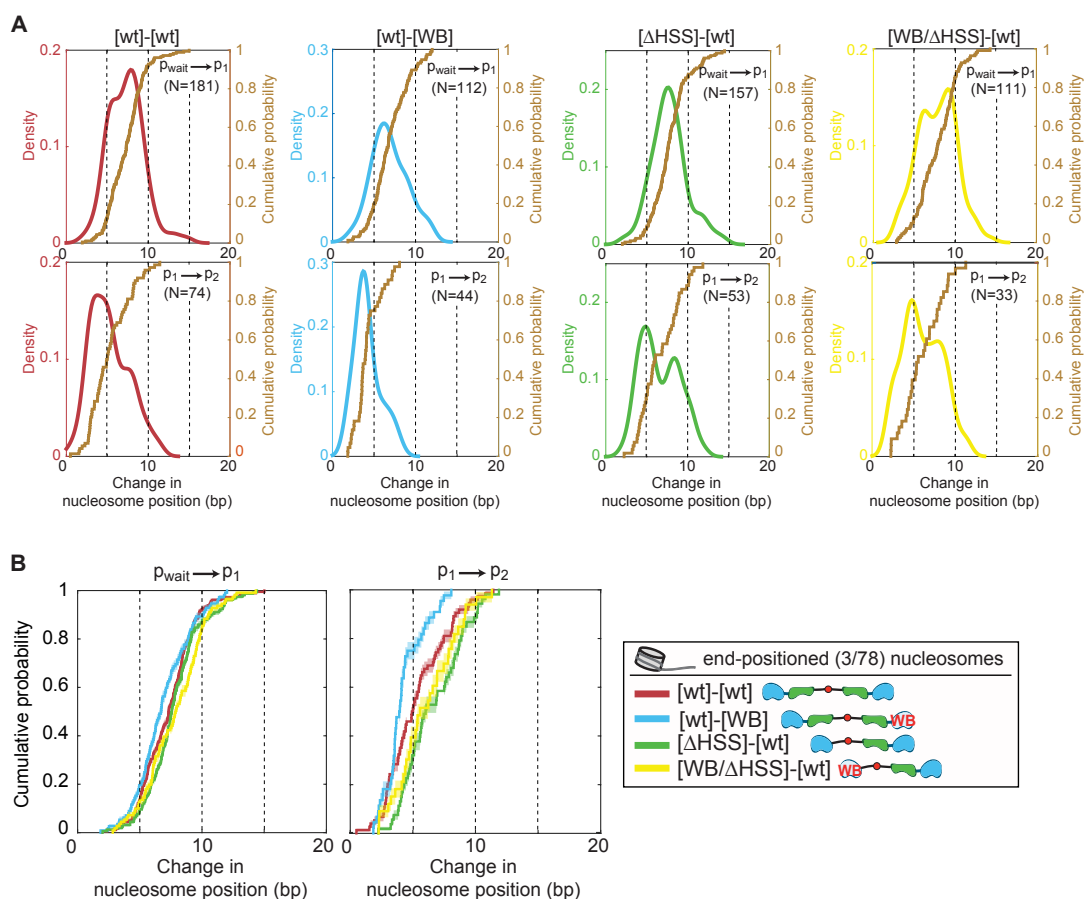

Figure S7: **Supplement to Fig. 4:** Translocation step sizes of mutants. (A) KDEs of translocation step sizes, with corresponding CDFs overlaid, for the [wt]-[wt] construct and the four asymmetrically mutant dimers. See Fig. 1(D) for a description of these plots. N: number of remodeling events included in the KDE and CDF. KDE bandwidths are 0.75. (B) Overlaid CDFs for the first (left) or second (right) translocation events, for the four constructs in (A). Mean step sizes for first and second translocations respectively are:  $7.3 \pm 0.2$  bp and  $5.3 \pm 0.3$  bp for [wt]-[wt];  $6.9 \pm 0.2$  bp and  $4.2 \pm 0.2$  bp for [wt]-[WB];  $7.7 \pm 0.2$  bp and  $6.6 \pm 0.3$  bp for [ $\Delta$ HSS]-[wt];  $7.8 \pm 0.2$  bp and  $6.1 \pm 0.4$  bp for [WB/ $\Delta$ HSS]-[wt]. All enzyme concentrations are saturating (25 nM [wt]-[wt], 100 nM [ $\Delta$ HSS]-[wt], 50 nM [wt]-[WB], 200 nM [WB/ $\Delta$ HSS]-[wt]); ATP is saturating (1 mM).
